# Supplementary material for: Gamma titanium phosphate as an electrode material for Li-ion and Na-ion storage: performance and mechanism
Source: Royal Society of Chemistry journal article supplement (doi:10.1039/c6ta07751j), 2016-01-01
Supplement: c6ta07751j1.pdf [file c6ta07751j1.pdf]

### Supplementary Information

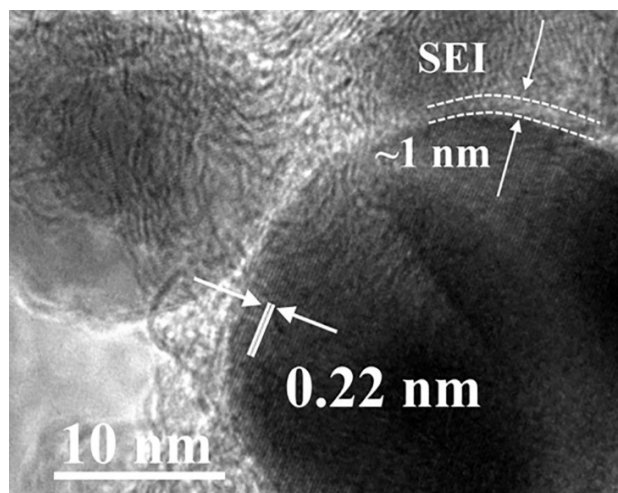

Figure S1. HRTEM image of the G-TiP electrodes after discharging to 1.9 V in a voltage of 0.1-2.8

V for Lithium cells.

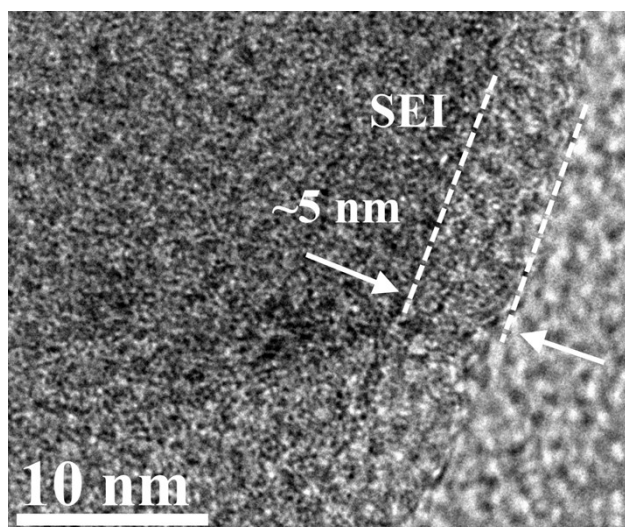

Figure S2. HRTEM image of the G-TiP electrodes after discharging to 0.1 V in a voltage of 0.1-2.8

V for Lithium cells.

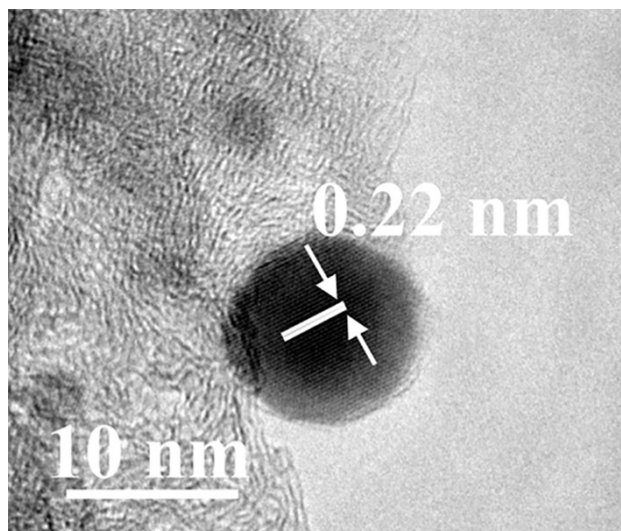

Figure S3. HRTEM image of the G-TiP electrode after charging to 2.8 V in a voltage of 0.8-2.8 V for

Lithium cells.
